# Supplementary material for: A new accurate low-cost instrument for fast synchronized spatial measurements of light spectra
Source: Copernicus journal article supplement (doi:10.5194/amt-16-3767-2023), 2023-08-14
Supplement: Supplementary file 1 [file amt-16-3767-2023-supplement.zip]

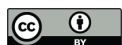

## *Supplement of*

# **A new accurate low-cost instrument for fast synchronized spatial measurements of light spectra**

**Bert G. Heusinkveld et al.**

*Correspondence to:* Bert G. Heusinkveld ([bert.heusinkveld@wur.nl](mailto:bert.heusinkveld@wur.nl))

- [amt-16-3767-2023-supplement-title-page.pdf](#)
- [Supplementary materials 1.txt](#)

The copyright of individual parts of the supplement might differ from the article licence.
